# Supplementary material for: Surface modification and adhesive-free adhesion of polytetrafluoroethylene (PTFE) and silicone gel containing oleophilic SiO2 powder by plasma treatment
Source: Royal Society of Chemistry journal article supplement (doi:10.1039/d2ra05749b), 2023-01-01
Supplement: d2ra05749b4.pdf [file d2ra05749b4.pdf]

*Electronic Supplementary Information*

**Surface modification and adhesive-free adhesion of  
polytetrafluoroethylene (PTFE) and silicone gel  
containing oleophilic SiO<sub>2</sub> powder by plasma treatment**

Erika Miyake,<sup>a</sup> Misa Nishino,<sup>a</sup> Yosuke Seto,<sup>a</sup> Izuru Komatsu,<sup>b</sup> Katsuyoshi Endo,<sup>a</sup> Kazuya Yamamura<sup>a</sup> and Yuji Ohkubo<sup>\*a</sup>

<sup>a</sup> Graduate School of Engineering, Osaka University, 2-1 Yamadaoka, Suita, Osaka 565-0871, Japan

<sup>b</sup> Toshiba Corporate Manufacturing Engineering Center, 33 Shin-Isogo-cho, Isogo-ku, Yokohama 235-0017, Japan

\* Corresponding author email : [okubo@upst.eng.osaka-u.ac.jp](mailto:okubo@upst.eng.osaka-u.ac.jp)

## Contents

1. PTFE/silicone gel adhesion strength of PTFE/SG20-OP5 assembly with the different thickness. .... **ESI-1**
2. C1s-XPS spectra of the PTFE samples before and after HAP treatment.....**ESI-2**
3. SEM images of PTFE samples before and after HAP treatment..... **ESI-3**
4. FTIR-RAS spectra of silicone gel containing oleophilic SiO<sub>2</sub> powder before and after PJ treatment..... **ESI-4**

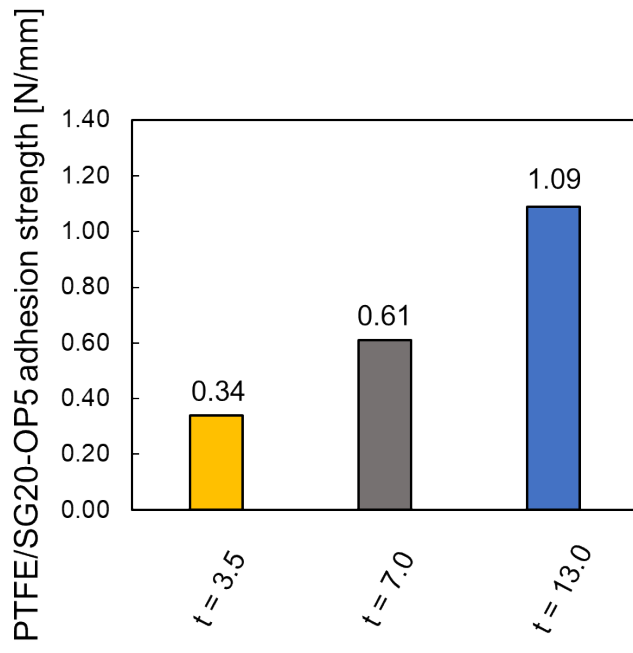

**ESI-1** PTFE/silicone gel adhesion strength of PTFE/SG20-OP5 assembly with the different thickness.

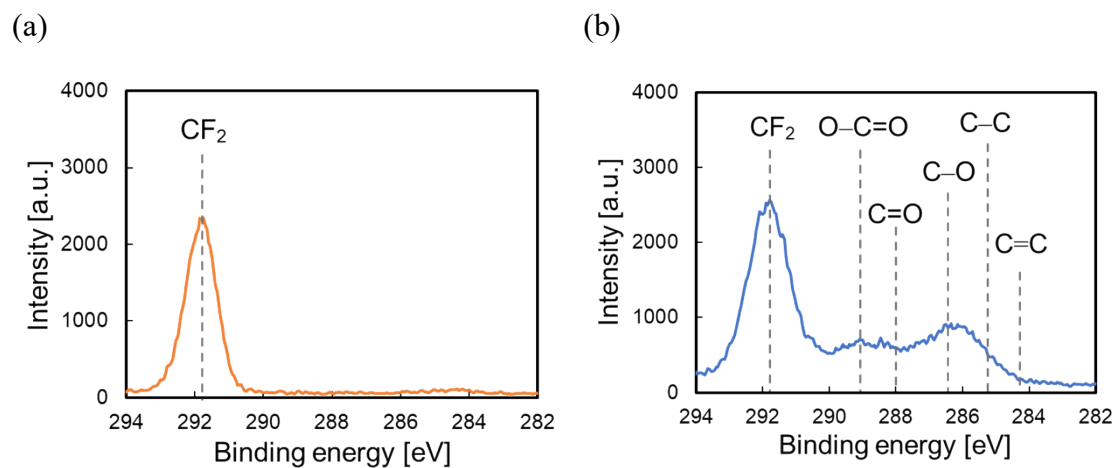

**ESI-2** C1s-XPS spectra of the PTFE samples (a) before and (b) after heat-assisted plasma (HAP) treatment.

(a)

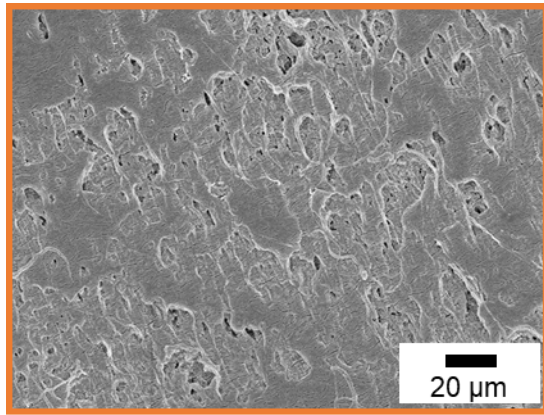

(b)

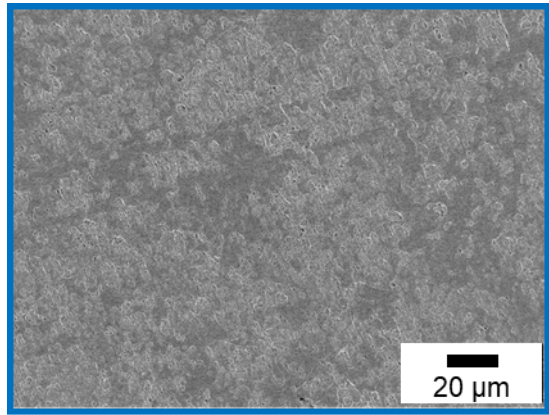

**ESI-3** SEM images of the PTFE samples (a) before and (b) after HAP treatment.

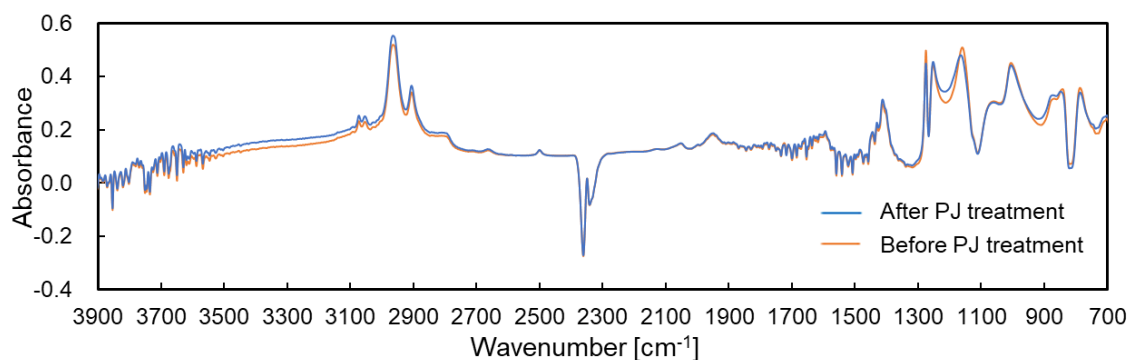

**ESI-4** FTIR-RAS spectra of silicone gel containing oleophilic SiO<sub>2</sub> powder before and after plasma jet (PJ) treatment. When FTIR-RAS measurement was performed for silicone gel containing oleophilic SiO<sub>2</sub> powder, noise was observed, and stable FTIR spectra could not be obtained. This was due to the presence of oleophilic SiO<sub>2</sub> powder, which scatters IR light and reduces the amount of light reaching the detector. In contrast, no noise was observed for FTIR-RAS spectrum of silicone gel non-containing oleophilic SiO<sub>2</sub> powder as shown in Fig. 5. Since noise makes it difficult to analyze the spectra of silicone gel, PJ treatment and FTIR-RAS measurement were performed for silicone gel non-containing oleophilic SiO<sub>2</sub> powder.
